# Supplementary material for: TRAPPC4 regulates the intracellular trafficking of PD-L1 and antitumor immunity
Source: PubMed Central journal article supplement (PMC8438078; doi:10.1038/s41467-021-25662-9), 2021-09-13
Supplement: 41467_2021_25662_MOESM1_ESM.pdf [file 41467_2021_25662_MOESM1_ESM.pdf]

# TRAPPC4 regulates the intracellular trafficking of PD-L1 and anti-tumor immunity

Yimeng Ren<sup>#1, 2, 3</sup>, Yun Qian<sup>#1, 2, 3</sup>, Luoyan Ai<sup>1, 2, 3, 4</sup>, Yile Xie<sup>1, 2, 3</sup>, Yaqi Gao<sup>1, 2, 3</sup>, Ziyang Zhuang<sup>1, 2, 3</sup>, Jinxian Chen<sup>5</sup>, Ying-Xuan Chen<sup>1, 2, 3</sup>, Jing-Yuan Fang<sup>\*1, 2, 3</sup>

<sup>1</sup> State Key Laboratory for Oncogenes and Related Genes, Key Laboratory of Gastroenterology and Hepatology, Ministry of Health, 145 Middle Shandong Road, 200001 Shanghai, China <sup>2</sup> Division of Gastroenterology and Hepatology, Renji Hospital, School of Medicine, Shanghai Jiao Tong University, 145 Middle Shandong Road, 200001 Shanghai, China <sup>3</sup> Shanghai Institute of Digestive Disease, Renji Hospital, School of Medicine, Shanghai Jiao Tong University, 145 Middle Shandong Road, 200001 Shanghai, China <sup>4</sup> Department of Medical Oncology, Zhongshan Hospital, Fudan University, 180 FengLin Road, 200032, Shanghai, China <sup>5</sup> Division of Gastrointestinal Surgery, Renji Hospital, School of Medicine, Shanghai Jiao Tong University, 145 Middle Shandong Road, 200001 Shanghai, China <sup>#</sup>Contributed equally.

# Supplementary information

## Table of Contents

|                                                                                                                                                |    |
|------------------------------------------------------------------------------------------------------------------------------------------------|----|
| Supplementary Figures .....                                                                                                                    | 2  |
| Supplementary Fig.1 Detection of PD-L1-binding TRAPP subunits by mass spectrometry. 2                                                          |    |
| Supplementary Fig. 2 Verification of the results of the mass spectrometry in RKO and HEK-293 cells. ....                                       | 3  |
| Supplementary Fig. 3 Regulation of PD-L1 expression by subunits of the TRAPP complex. ....                                                     | 4  |
| Supplementary Fig. 4 The effects of TRAPPC4 and other TRAPP subunits on anti-tumor immunity. ....                                              | 6  |
| Supplementary Fig. 5 Knockdown of TRAPPC4 affects tumor growth and tumor microenvironment components in vivo. ....                             | 7  |
| Supplementary Fig. 6 Regulation by TRAPPC4 and RAB11 on the expression of PD-L1. ..                                                            | 8  |
| Supplementary Fig. 7 Overexpression of TRAPPC4 promotes the efficacy of immune checkpoint blockade therapy. ....                               | 9  |
| Supplementary Fig. 8 Infiltration of the TILs in Trappc4-OE tumors with or without anti-PD-L1 treatment was analyzed with flow cytometry. .... | 10 |
| Supplementary Fig. 9 Scheme of the gating strategy used in flow cytometry assays. ....                                                         | 11 |
| Supplementary Tables .....                                                                                                                     | 12 |
| Supplementary Table 1. Proteomic analysis of co-expression of PD-L1 and the subunits of TRAPP complex (cohort 2) .....                         | 12 |
| Supplementary Table 2. Reagents or resources used in this study .....                                                                          | 12 |
| Supplementary Table 3. Clinical and pathological information of 32 cases CRC patients (cohort 1) .....                                         | 15 |
| Supplementary Table 4. Sequence of si-RNAs in this study .....                                                                                 | 17 |
| Supplementary Table 5. Primers for quantitative real-time PCR analysis .....                                                                   | 17 |

## Supplementary Figures

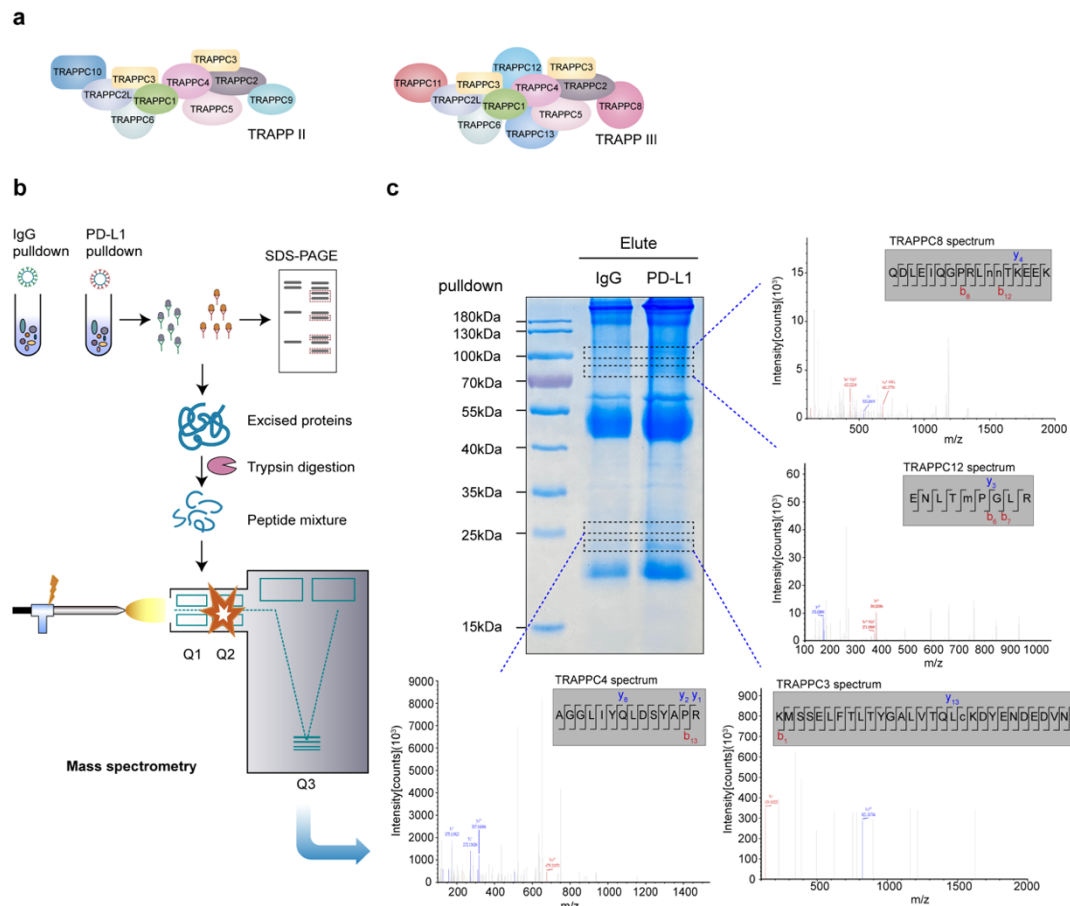

**Supplementary Fig. 1 Detection of PD-L1-binding TRAPP subunits by mass spectrometry.** **a**, Model of the mammalian TRAPP complexes. **b**, Schematic representation of the workflow to detect PD-L1-binding TRAPP subunits. The antibody targeting PD-L1 was added into a lysate of RKO cells to immunoprecipitated the endogenous PD-L1 protein along with its interacting proteins. Immunoprecipitation of IgG was included as the negative control. The proteins were separated by SDS-PAGE and stained by Coomassie brilliant blue to determine the specific stained bands in PD-L1 immunoprecipitation and analyzed using LC-MS/MS. **c**, Mass spectrometry analysis identified TRAPPC3, 4, 8, and 12 as the interaction partners of PD-L1. The bands indicated in this figure were analyzed using LC-MS/MS and the interacting TRAPP subunits were identified in presence of PD-L1 immunoprecipitation and absence of that of IgG. Source data are provided as a Source Data file.

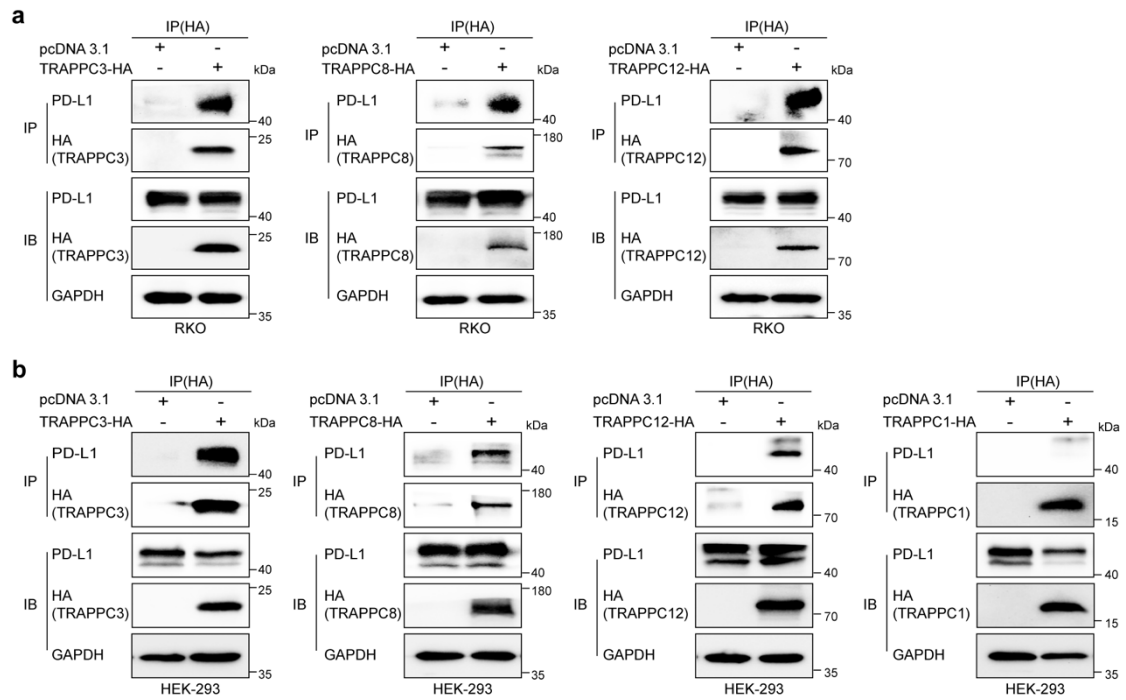

**Supplementary Fig. 2 Verification of the results of the mass spectrometry in RKO and HEK-293 cells. a& b,** The results of the mass spectrometry were verified by immunoprecipitation of the indicated TRAPP subunits in RKO (**a**) and HEK293 (**b**) cells. RKO and HEK293 cells were transfected with HA-TRAPPC3, 8, and 12 plasmids and immunoprecipitated with anti-HA antibodies to detect their interaction with PD-L1. HA-TRAPPC1 was included as a control representing the TRAPP subunits lacking an interaction with PD-L1. This experiment was repeated twice with similar results. Source data are provided as a Source Data file.

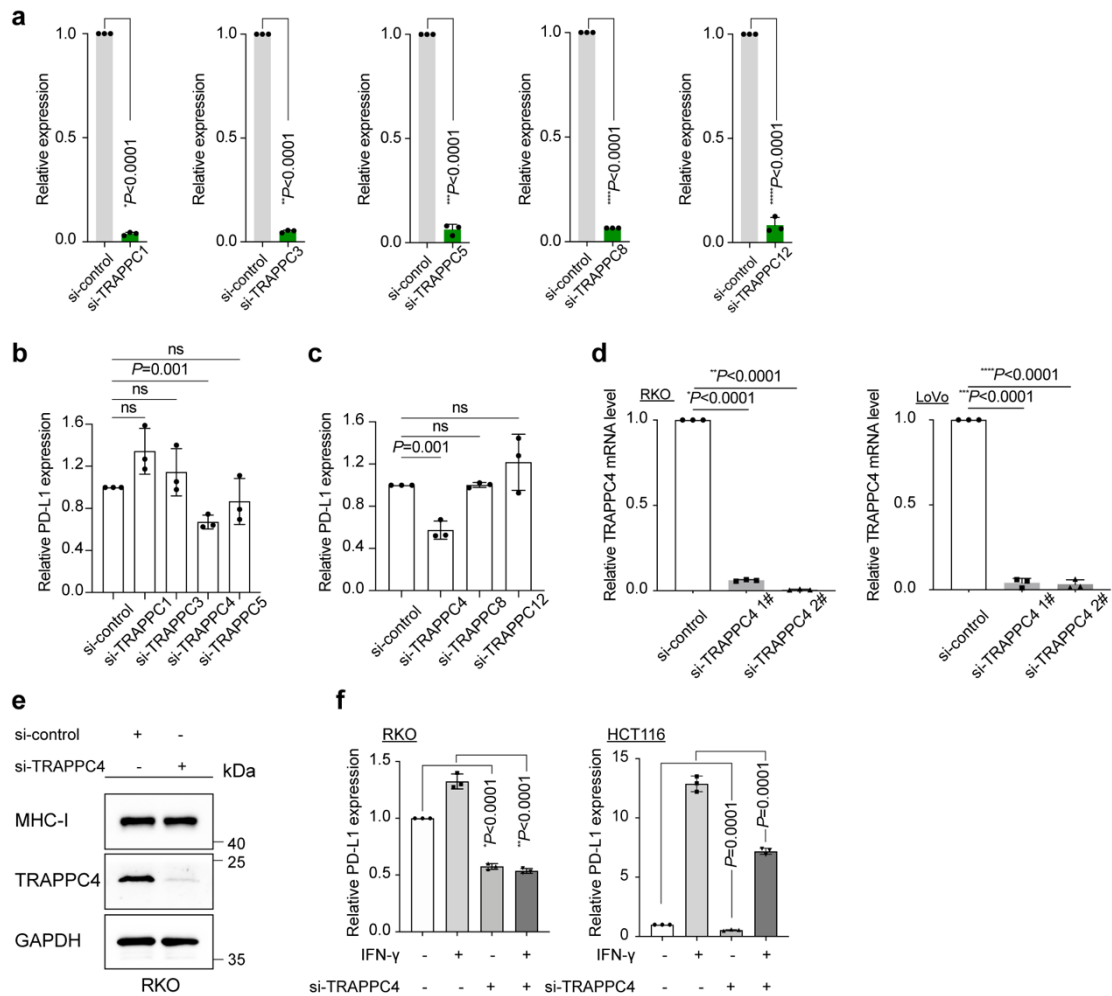

**Supplementary Fig. 3 Regulation of PD-L1 expression by subunits of the TRAPP complex.** **a**, The knockdown efficiency of siRNAs targeting different subunits of the TRAPP complex was determined using qRT-PCR in RKO cells. The means  $\pm$  SD of three biological replicates is shown. ( $*P=2.19e-9$ ,  $**P=1.1e-9$ ,  $***P=3.69e-7$ ,  $****P=8e-15$ ,  $*****P=1.72e-6$ ) **b& c**, The semiquantitative analysis of the indicated immunoblots in **Fig. 2b**. Values indicated means  $\pm$  SD of the relative level of PD-L1 from three independent replicates, compared using a two-sided Student's *t* test. **d**, The knockdown efficiency of TRAPPC4 siRNA was determined using qRT-PCR in RKO cells and LoVo cells. The means  $\pm$  SD of three biological replicates is shown. Data were analyzed by two-sided student's *t* test. ( $*P=3.82e-10$ ,  $**P=6e-11$ ,  $***P=3.79e-7$ ,  $****P=4.13e-7$ ) **e**, Western blot showing that interference with TRAPPC4 expression did not alter the level of MHC class I. The experiment was conducted three times independently with similar results. **f**, Values indicate means  $\pm$  SD of the relative

gray values of the indicated blots from three independent assays, compared by a two-sided Student's *t* test. (\* $P=7.93e-6$ , \*\* $P=3.84e-5$ ) Source data are provided as a Source Data file.

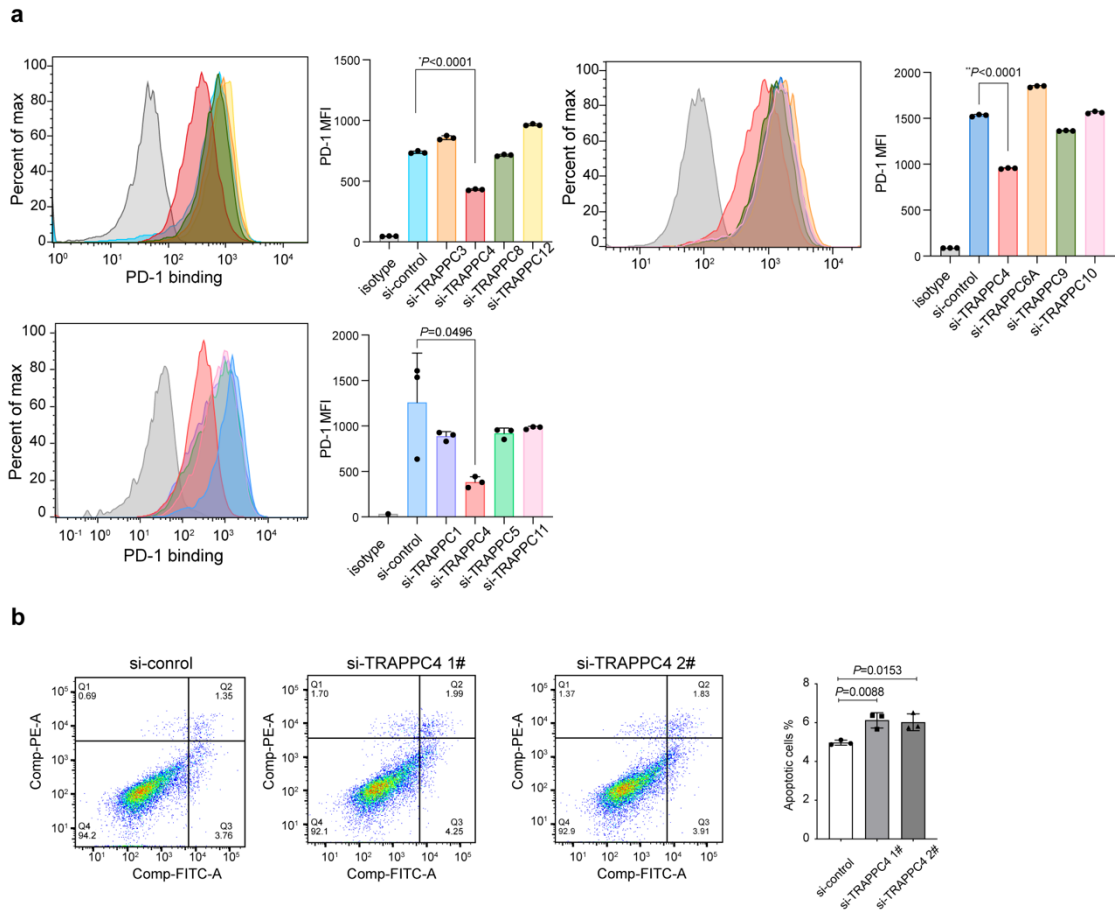

**Supplementary Fig. 4 The effects of TRAPPC4 and other TRAPP subunits on anti-tumor immunity. a**, The binding of PD-1 with PD-L1 on RKO cells treated with the indicated siRNAs was detected using flow cytometry. The y-axis indicates the MFI of fluorescence conjugated PD-1. This figure represents the result of three independent experimental replicates. Values indicate means  $\pm$  SD, compared using a two-tailed Student's *t* test. ( $*P=1.57e-6$ ,  $**P=1.77e-7$ ) **b**, Flow cytometry assay indicating that a slight increase in apoptosis was induced by interference with TRAPPC4 expression. Values indicate means  $\pm$  SD of the percentage of apoptotic cells from three independent replicates. Statistical analysis was performed using a two-tailed Student's *t* test. Source data are provided as a Source Data file.

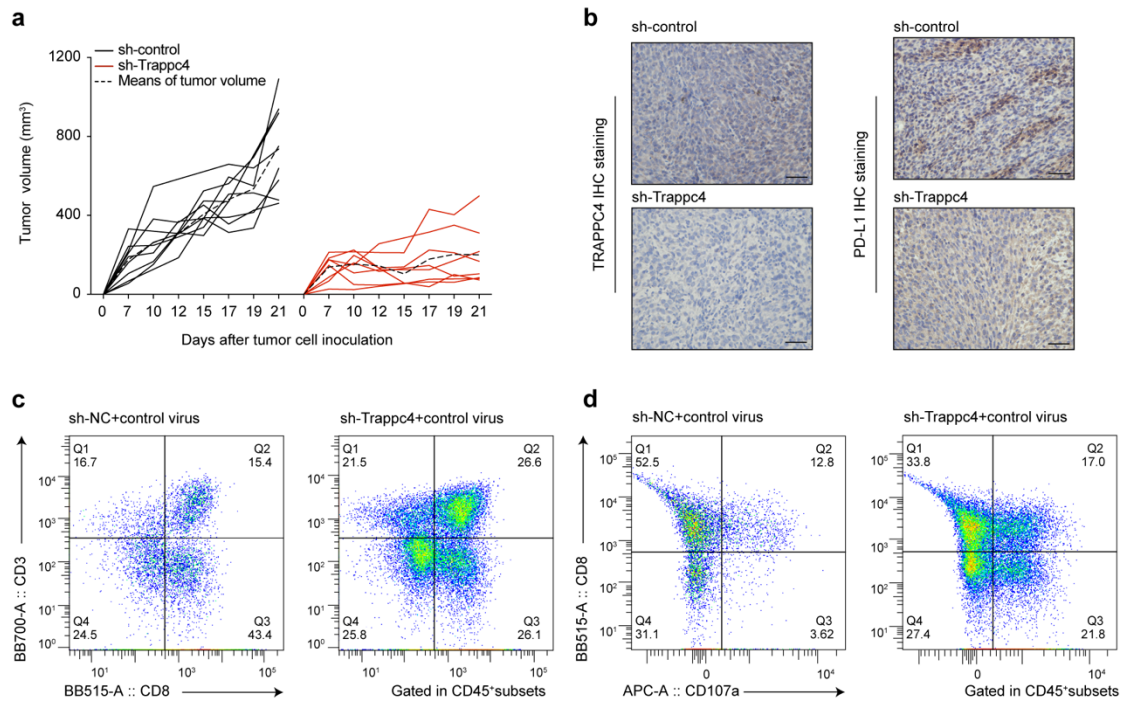

**Supplementary Fig. 5 Knockdown of TRAPPC4 affects tumor growth and**

**tumor microenvironment components in vivo. a,**

The growth of individual tumors in mice bearing control and Trappc4-deficient MC38 tumors ( $n=9$  per group). The dashed lines represented the mean volumes of the tumors in the different groups.

**b,** Representative immunohistochemical staining of TRAPPC4 and PD-L1 of tumors in different groups of mice. The experiment was repeated in three animal samples with similar results. Scale bars, 100 $\mu$ m.

**c& d,** CD3<sup>+</sup> CD8<sup>+</sup> T cells (c) and CD8<sup>+</sup> CD107a<sup>+</sup> T cells (d) were analyzed using flow cytometry and the representative images with the percentage of the target subsets are shown, as gated in CD45<sup>+</sup> subsets.

Source data are provided as a Source Data file.



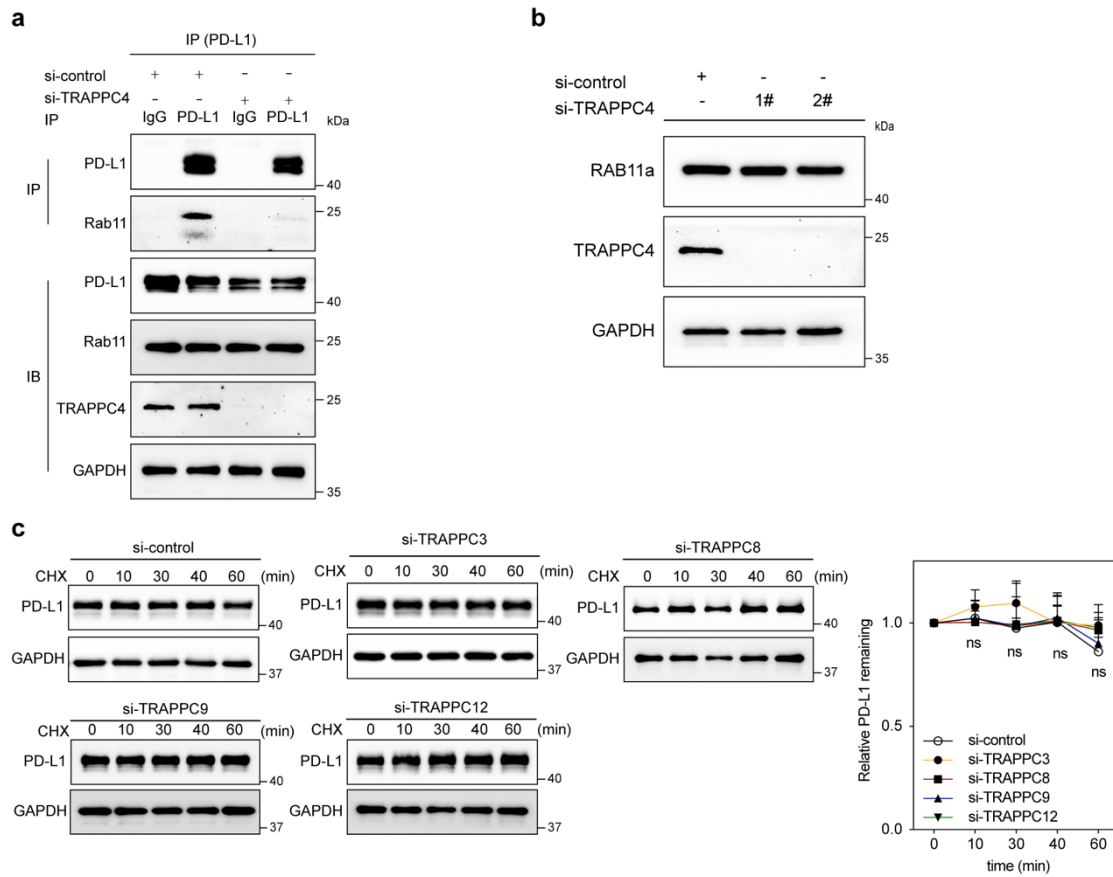

**Supplementary Fig. 6 Regulation by TRAPPC4 and RAB11 on the expression of PD-L1.** **a**, The Co-IP assay detecting interaction between PD-L1 and RAB11 with or without the knockdown of TRAPPC4. This experiment was repeated three times with similar results. **b**, Western blotting assay showing that knockdown of Trappc4 did not affect the expression of RAB11 in RKO cells. This experiment was repeated independently three times with similar results. **c**, CHX-chase assay indicating that the stability of PD-L1 was not significantly affected upon the knockdown of the indicated TRAPP subunits in RKO cells. The relative level of the remaining PD-L1 is quantified on the right and values indicates means  $\pm$  SEM of the relative gray values. Statistical analysis was carried out using a two-tailed Student's *t*-test. This experiment was repeated three times with similar results. ns, not significant. Source data are provided as a Source Data file.

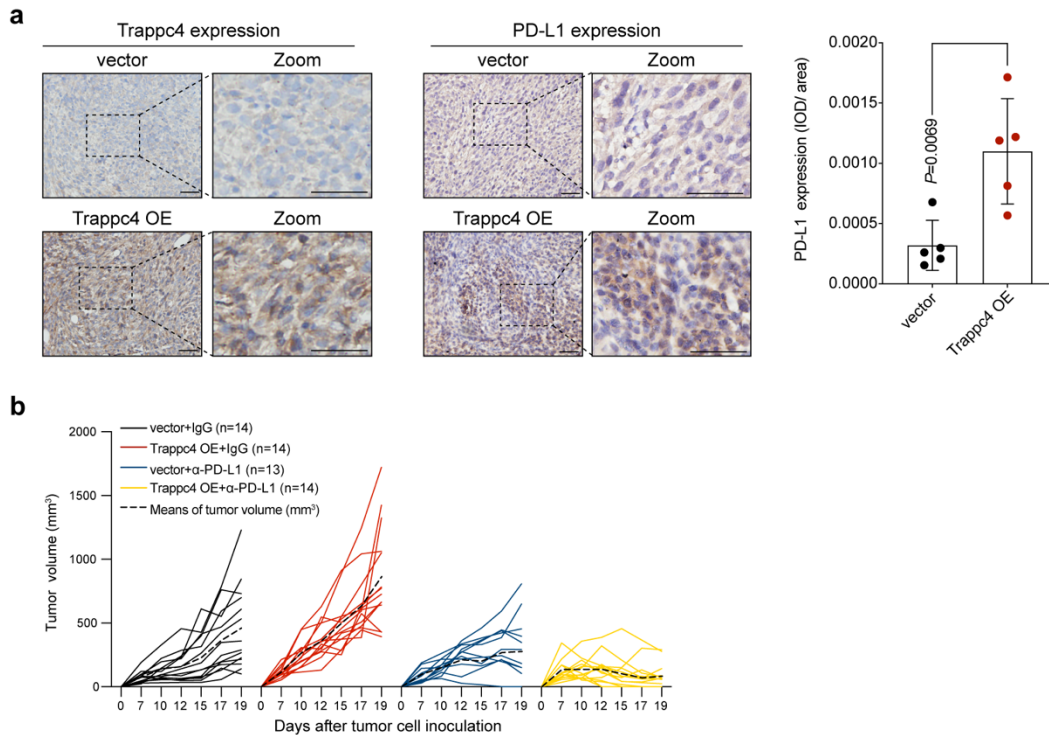

**Supplementary Fig. 7 Overexpression of TRAPPC4 promotes the efficacy of immune checkpoint blockade therapy.** **a**, Detection of TRAPPC4 and PD-L1 expression with immunohistochemical staining in control and Trappc4-OE groups. PD-L1 IHC scores were assessed using Image-Pro Plus and values indicates means  $\pm$  SD from each group ( $n=5$  per group). Statistical analysis was carried out using a two-tailed Student's *t*-test. Scale bars, 100  $\mu\text{m}$ . OE, overexpressing. **b**, The growth of individual tumors in the control and Trappc4-OE groups, with or without treatment with the anti-PD-L1 mAb. The dashed lines represent the mean volumes of the tumors in the different groups. Source data are provided as a Source Data file.

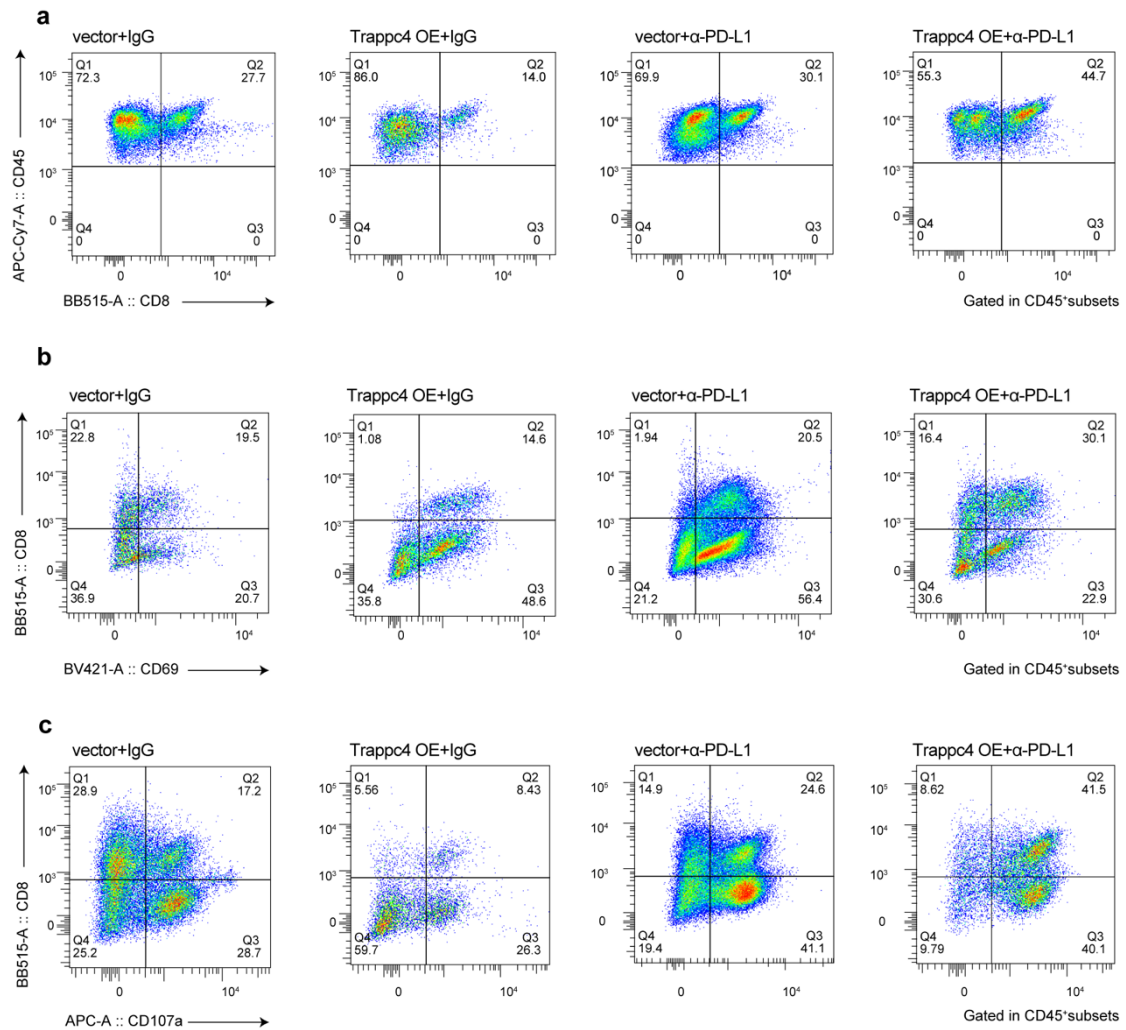

**Supplementary Fig. 8** Infiltration of the TILs in Trappc4-OE tumors with or without anti-PD-L1 treatment was analyzed with flow cytometry. a-c, Infiltration of CD8<sup>+</sup> T cells (c), CD8<sup>+</sup> CD69<sup>+</sup> T cells (d) CD8<sup>+</sup> CD107a<sup>+</sup> T cells (e) in different groups in **Fig. 6a** were analyzed using flow cytometry and the representative images with the percentage of the target subsets are shown, as gated in CD45<sup>+</sup> subsets. Source data are provided as a Source Data file.

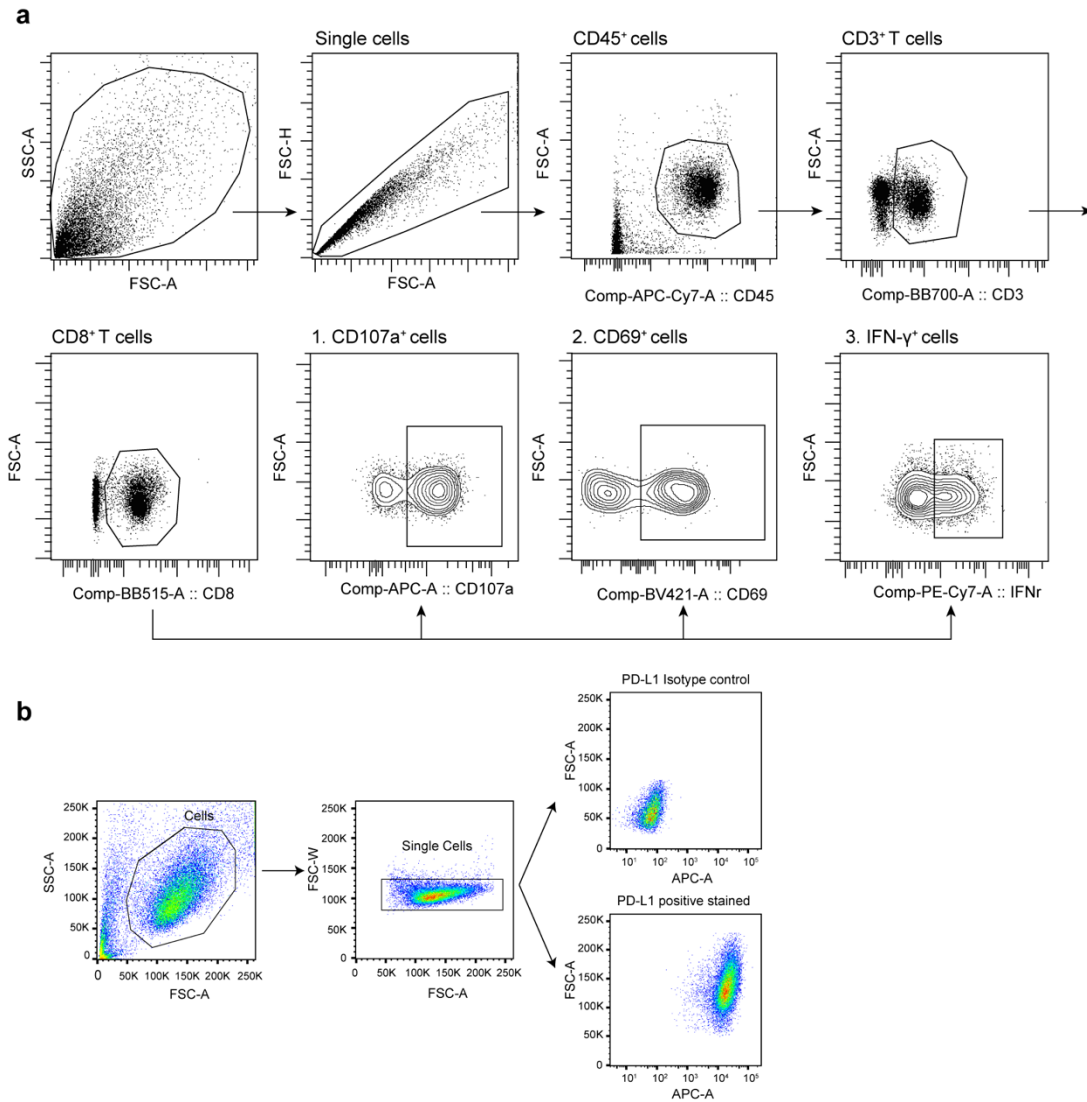

**Supplementary Fig. 9 Scheme of the gating strategy used in flow cytometry assays. a**, Scheme of the gating strategy used to examine different cell subsets in Fig. 3 and Fig. 6. **b**, Representative example of the gating strategies used for detection of PD-L1 on the cell surface.

## Supplementary Tables

**Supplementary Table 1. Proteomic analysis of co-expression of PD-L1 and the subunits of TRAPP complex (cohort 2)**

| Co-expression with PD-L1 | Pearson r | P-value* |
|--------------------------|-----------|----------|
| TRAPPC1                  | 0.75      | 0.09     |
| TRAPPC2                  | 0.00      | 0.99     |
| TRAPPC3                  | 0.57      | 0.0045   |
| TRAPPC4                  | 0.69      | 0.0003   |
| TRAPPC5                  | 0.69      | 0.0003   |
| TRAPPC6A                 | -0.05     | 0.91     |
| TRAPPC6B                 | 0.35      | 0.1      |
| TRAPPC8                  | 0.41      | 0.05     |
| TRAPPC9                  | 0.08      | 0.75     |
| TRAPPC10                 | 0.12      | 0.61     |
| TRAPPC11                 | 0.23      | 0.3      |
| TRAPPC12                 | 0.07      | 0.75     |
| TRAPPC13                 | 0.25      | 0.27     |

\* Data were analyzed by two-sided Pearson correlation.

**Supplementary Table 2. Reagents or resources used in this study**

| Antibodies          |                           |                       |                             |
|---------------------|---------------------------|-----------------------|-----------------------------|
| Name                | Source                    | Catalogue no.         | Dilution                    |
| Rabbit anti- PD-L1  | Cell signaling Technology | CAT#13684             | 1:1,000 (WB)<br>1:100 (IHC) |
| Rabbit anti-PD-L1   | Proteintech               | CAT#17952-1-AP        | 1:100 (IF, IHC)             |
| Mouse anti-PD-L1    | Cell signaling Technology | CAT#29122             | 1:100 (IF)                  |
| Mouse anti-TRAPPC4  | Abcam                     | CAT#ab57364           | 1:1,000 (WB)                |
| Mouse anti-TRAPPC4  | Abnova                    | CAT#H00051399-<br>M01 | 1:1,000 (WB)<br>1:100 (IF)  |
| Rabbit anti-TRAPPC4 | Sigma-Aldrich             | CAT#HPA041371         | 1:1,000 (WB)<br>1:100 (IHC) |
| Rabbit anti-CD8     | Cell signaling Technology | CAT#98941             | 1:200                       |
| Rabbit anti-CD4     | Abcam                     | CAT#ab183685          | 1:200                       |
| Rabbit anti-Giantin | Abcam                     | CAT#ab80864           | 1:200                       |
| Rabbit anti-EEA1    | Abcam                     | CAT#ab2900            | 1:200                       |
| Mouse anti-Lamp1    | Abcam                     | CAT#ab25630           | 1:200                       |
| Mouse anti-Rab11    | BD Biosciences            | CAT#610656            | 1:1,000                     |

|                                                          |                         |                |         |
|----------------------------------------------------------|-------------------------|----------------|---------|
| Mouse anti-HA tag                                        | Biolegend               | CAT#901513     | 1:1,000 |
| Anti-GAPDH-HRP                                           | KANGCHENG<br>Technology | CAT#KC-5G5     | 1:3,000 |
| Anti-rabbit-HRP                                          | KANGCHENG<br>Technology | CAT#KC-RB-035  | 1:5,000 |
| Anti-mouse-HRP                                           | KANGCHENG<br>Technology | CAT#KC-MM-035  | 1:5,000 |
| Anti-mouse Alexa Fluor 488<br>dye conjugated antibody    | Invitrogen              | CAT#A-21202    | 1:400   |
| Anti-rabbit Alexa Fluor 594<br>dye conjugated antibody   | Invitrogen              | CAT#R37119     | 1:400   |
| Anti-human Alexa Fluor<br>488 dye conjugated<br>antibody | Invitrogen              | CAT#A-11013    | 1:400   |
| APC anti-human CD274<br>(B7-H1, PD-L1) Antibody          | Biolegend               | CAT#329708     | 1:250   |
| APC mouse anti-human<br>CD45                             | BD Biosciences          | CAT#561863     | 1:200   |
| APC-Cy7 Rat anti-mouse<br>CD45                           | BD Biosciences          | CAT#557659     | 1:100   |
| PerCP Cy5.5 anti-mouse<br>CD3                            | eBioscience             | CAT#45-0031-82 | 1:100   |
| FITC anti-mouse CD8a                                     | Biolegend               | CAT#100706     | 1:100   |
| BV421 anti-mouse CD69                                    | Biolegend               | CAT#104528     | 1:100   |
| APC anti-mouse CD107a                                    | Biolegend               | CAT#121614     | 1:100   |
| PE-Cy7 Rat anti-mouse<br>IFN- $\gamma$                   | BD Biosciences          | CAT#557649     | 1:50    |

| <b>Chemicals, reagents and Recombinant Proteins</b> |                  |                      |
|-----------------------------------------------------|------------------|----------------------|
| <b>Name</b>                                         | <b>Source</b>    | <b>Catalogue no.</b> |
| AOM                                                 | Sigma-Aldrich    | CAT# A5486           |
| DSS                                                 | MP Chemicals Inc | CAT# 0216011080      |
| FuGENE HD                                           | Promega          | CAT#E2311            |
| DharmaFECT Transfection<br>Reagent                  | Dharmacon        | CAT#T-2001-02        |
| DharmaFECT Duo Transfection<br>Reagent              | Dharmacon        | CAT#T-2010-03        |

|                                           |                   |                   |
|-------------------------------------------|-------------------|-------------------|
| Recombinant human PD-1 Fc chimera protein | R&D Systems       | CAT#1086-PD-050   |
| Recombinant Human IFN-gamma Protein       | R&D Systems       | CAT#285-IF-100/CF |
| Cycloheximide                             | Sigma-Aldrich     | CAT#C1988         |
| Chloroquine                               | Sigma-Aldrich     | CAT#C6628         |
| NH <sub>4</sub> Cl                        | Aladdin Chemistry | CAT#A116373       |
| MG132                                     | Sigma-Aldrich     | CAT# M8699        |
| RNAiso Plus                               | Takara            | CAT# 9109         |
| DAPI                                      | SouthernBiotech   | CAT#0100-20       |
| Pierce IP Lysis Buffer                    | Thermo Fisher     | CAT#87787         |
| Pierce protein G Agarose                  | Thermo Fisher     | CAT#20398         |
| InVivoMab anti-mouse PD-L1                | Bioxcell          | CAT#BE0101        |

| <b>Critical Commercial Assays</b>        |                 |                      |
|------------------------------------------|-----------------|----------------------|
| <b>Name</b>                              | <b>Source</b>   | <b>Catalogue no.</b> |
| FITC Annexin V Apoptosis Detection Kit I | BD Biosciences  | CAT#556547           |
| PrimeScript RT Reagent Kit               | Takara          | CAT# RR036A          |
| TB Green Premix Ex Taq II                | Takara          | CAT# RR820L          |
| Pierce BCA protein assay kit             | Thermo Fisher   | CAT#23227            |
| T Cell Activation/Expansion Kit          | Miltenyi Biotec | CAT#130-091-441      |

| <b>Recombinant DNA</b> |               |                      |
|------------------------|---------------|----------------------|
| <b>Name</b>            | <b>Source</b> | <b>Catalogue no.</b> |
| pcDNA-Myc-TRAPPC4      | GeneRay, Inc  | N/A                  |
| pcDNA-Flag-PD-L1       | GeneRay, Inc  | N/A                  |
| pcDNA-HA-Rab11         | GeneRay, Inc  | N/A                  |
| pcDNA-HA-Rab11Q70L     | GeneRay, Inc  | N/A                  |
| pcDNA-HA-Rab11S25N     | GeneRay, Inc  | N/A                  |

| <b>Experimental Models: Cell Lines</b> |               |                         |
|----------------------------------------|---------------|-------------------------|
| <b>Name</b>                            | <b>Source</b> | <b>Catalogue no.</b>    |
| HCT116 Cells                           | ATCC          | CAT# CCL-247            |
| RKO Cells                              | ATCC          | CAT# CRL-2577           |
| LoVo Cells                             | ATCC          | CAT# CCL-229            |
| MC38                                   | BMCR          | CAT# 1101MOU-PUMC000523 |

| <b>Experimental Models: Strains</b> |         |           |
|-------------------------------------|---------|-----------|
| <i>TRAPPC4</i> <sup>ΔIEC</sup>      |         | N/A       |
| <i>Escherichia coli</i> strain DH5α | TIANGEN | CAT#CB101 |

| <b>Biological Samples</b> |  |  |
|---------------------------|--|--|
|---------------------------|--|--|

| Formalin-fixed paraffin-embedded colorectal cancer tissues | Renji Hospital affiliated with Shanghai Jiaotong University School of Medicine | N/A                                                                                                                                                                                                         |
|------------------------------------------------------------|--------------------------------------------------------------------------------|-------------------------------------------------------------------------------------------------------------------------------------------------------------------------------------------------------------|
| Software and Algorithms                                    |                                                                                |                                                                                                                                                                                                             |
| ImageJ 2.1.0                                               | National Institutes of Health (open source)                                    | <a href="https://imagej.nih.gov/ij/">https://imagej.nih.gov/ij/</a>                                                                                                                                         |
| Image-Pro Plus 6.0                                         | Media Cybernetics, Inc.                                                        | <a href="https://www.mediacy.com/imageproplus">https://www.mediacy.com/imageproplus</a>                                                                                                                     |
| Graphpad Prism 7.03                                        | Graphpad                                                                       | <a href="https://www.graphpad.com/scientific-software/prism/">https://www.graphpad.com/scientific-software/prism/</a>                                                                                       |
| ZEN 2011                                                   | ZEISS                                                                          | <a href="https://www.zeiss.com/microscopy/">https://www.zeiss.com/microscopy/</a>                                                                                                                           |
| FlowJo 10.4                                                | BD Biosciences                                                                 | <a href="https://www.flowjo.com">https://www.flowjo.com</a>                                                                                                                                                 |
| FACSDiva 6.2                                               | BD Biosciences                                                                 | <a href="https://www.bdbiosciences.com/en-us/products/software/instrument-software/bd-facsdiva-software">https://www.bdbiosciences.com/en-us/products/software/instrument-software/bd-facsdiva-software</a> |

**Supplementary Table 3. Clinical and pathological information of 32 cases CRC patients (cohort 1)**

| NO. | Location           | Tumor Size (cm) | Grade | TNM stage | Expression of TRAPPC4 (IOD/area) | Expression of PD-L1 (IOD/area) |
|-----|--------------------|-----------------|-------|-----------|----------------------------------|--------------------------------|
| 1   | Descending colon   | 4*3*0.6         | II    | T4N1M1    | 9.57                             | 9.21                           |
| 2   | Sigmoid colon      | 2.5*1.5*0.8     | II    | T4N0M0    | 8.97                             | 8.27                           |
| 3   | Sigmoid colon      | 4*4*1           | II    | T3N0M0    | 4.18                             | 7.30                           |
| 4   | Rectum             | 4*3.5*1         | II    | T4aN0M0   | 11.40                            | 12.45                          |
| 5   | Rectum             | 5*4*0.8         | II    | T3N0M0    | 7.02                             | 4.29                           |
| 6   | Ileocecal junction | 5.5*2*1.5       | III   | T4aN0M0   | 7.55                             | 3.44                           |
| 7   | Sigmoid colon      | 4*3.5*0.8       | II    | T3N1M0    | 6.24                             | 8.86                           |
| 8   | Ascending colon    | 4*3*1           | II    | T3N2M0    | 3.65                             | 2.94                           |



|    |                    |           |        |          |       |       |
|----|--------------------|-----------|--------|----------|-------|-------|
| 9  | Sigmoid colon      | 4*3*1     | II     | T3N0M0   | 2.97  | 9.44  |
| 10 | Ascending colon    | 5*4*4     | II     | T3N0M0   | 6.07  | 6.58  |
| 11 | Ileocecal junction | 4*4*3     | II     | T3N0M0   | 2.64  | 4.99  |
| 12 | Rectum             | 3.5*2*0.5 | II     | T4aN0M0  | 3.84  | 6.98  |
| 13 | Descending colon   | 5*5*2.5   | II     | T4aN0M0  | 0.03  | 0.06  |
| 14 | Transverse colon   | 6*4*1     | II     | T3N0M0   | 12.50 | 7.29  |
| 15 | Ileocecal junction | 7*7*3     | II-III | T3N0M0   | 14.40 | 8.78  |
| 16 | Rectum             | 3*3*1     | II     | T4N0M0   | 12.11 | 9.15  |
| 17 | Rectum             | 5*3.5*1   | II     | T4N2M0   | 17.20 | 24.30 |
| 18 | Sigmoid colon      | 7*4*2     | II     | T4N0M0   | 9.84  | 13.31 |
| 19 | Sigmoid colon      | 2.5*2*1.2 | II     | T4N2M1   | 2.56  | 0.01  |
| 20 | Descending colon   | 6.5*4*3.5 | II     | T3N0M1   | 0.00  | 0.09  |
| 21 | Ileocecal junction | 5*3.5*0.7 | II     | T3N1M0   | 0.00  | 0.11  |
| 22 | Rectum             | 5*3*1     | II     | T4N0M0   | 3.46  | 2.74  |
| 23 | Sigmoid colon      | 7.5*3.5*3 | II     | T4N2M1   | 3.65  | 3.37  |
| 24 | Descending colon   | 3.5*2.5*1 | II-III | T4bN1bM0 | 0.00  | 0.43  |
| 25 | Ascending colon    | 3.5*3*2   | II     | T3N1aM0  | 1.43  | 0.14  |
| 26 | Rectum             | 7.5*5*1   | II     | T3N0M0   | 0.07  | 0.06  |
| 27 | Ascending colon    | 8*6*1     | II     | T3N2M1   | 11.70 | 15.41 |
| 28 | Rectum             | 3.5*1.5*1 | II     | T4N2M0   | 10.10 | 5.04  |
| 29 | Rectum             | 7*5.5*2   | II     | T4N1M0   | 1.21  | 1.05  |
| 30 | Ascending colon    | 3.5*3*1.5 | II     | T2N0M0   | 3.72  | 2.61  |
| 31 | Rectum             | 2.5*2*0.7 | II     | T2N1M0   | 0.04  | 0.23  |
| 32 | Rectum             | 4*3*0.5   | II     | T4N0M0   | 4.84  | 4.12  |

**Supplementary Table 4. Sequence of si-RNAs in this study**

| Target name | Sense (5'-3')         | Antisense (5'-3')     |
|-------------|-----------------------|-----------------------|
| TRAPPC4-1   | CGCCUCACUUCUAAUGAGATT | UCUCAUUAGAAGUGAGGCGTT |
| TRAPPC4-2   | GGAUCAAGUUUGUGGUUCUTT | AGAACCACAAACUUGAUCCTT |
| TRAPPC1     | GCUCCCGACUGGACUCCUATT | UAGGAGUCCAGUCGGGAGCTT |
| TRAPPC3     | GAGACGGUGUGACAGAAAUTT | AUUUCUGUCACACCGUCUCTT |
| TRAPPC5     | CGCUCAUCAACACCUACAUTT | AUGUAGGUGUUGAUGAGCGTT |
| TRAPPC6     | CGGAUACUGUGUUGUUUGATT | UCAACAACACAGUAUCCGTT  |
| TRAPPC8     | GGGUUGCUAUUUACUUAATT  | UUUAAGUAAAUAGCAACCCTT |
| TRAPPC9     | GGCAUGUGAAACUAUUGAATT | UUCAAUAGUUUCACAUGCCTT |
| TRAPPC10    | CUCCGAAGAUGAUUCACCUTT | AGGUGAAUCAUCUUCGGAGTT |
| TRAPPC11    | GGCCUGGAUGUAGUUUAUTT  | AUAAACUACAUCAGGCCCTT  |
| TRAPPC12    | GAUGCAGUUAAGACUUGATT  | UCAAGUCUUUAACUGCAUCTT |
| RAB11A-1    | GGAGAUUCUGGUGUUGGAATT | UCCAACACCAGAAUCUCCTT  |
| RAB11A-2    | GGAGCUGUAGGUGCCUUAUTT | AUAAGGCACCUACAGCUCCTT |
| RAB11A-3    | CCUAGACUCUACAAAUGUATT | UACAUUUGUAGAGUCUAGGTT |

**Supplementary Table 5. Primers for quantitative real-time PCR analysis**

| Gene name | Forward                 | Reverse                 |
|-----------|-------------------------|-------------------------|
| TRAPPC1   | TTCCAAACTAGCCGTTACAACT  | GCTCCACATACAGCGCACT     |
| TRAPPC3   | ACATTGGAGTCCGGCTGATTG   | CCGCAGTTTCCCAGAAAGTCAT  |
| TRAPPC4   | GTTCCAACGCTCTTTGCCA     | CCAGCTTGCCTAGGATCTGC    |
| TRAPPC5   | GTGGGTTTCTCCCCAGTGTAG   | TTGAGCGTGCTGTTCTCCTT    |
| TRAPPC8   | GAAACCTTTCTTCAGTCGATGCC | ACGCTACCAACATACATGCTAAA |
| TRAPPC12  | CACAGGAGTCGCTGGATAGAC   | CTGCTAAGCCTTGCTCCAAAT   |
| PD-L1     | TGGCATTGCTGAACGCATTT    | TGCAGCCAGGTCTAATTGTTTT  |
| GAPDH     | GCATTGCCCTCAACGACCAC    | CCACCACCCTGTTGCTGTAG    |
